# Supplementary material for: Molecular Genetic Approach and Evaluation of Cardiovascular Events in Patients with Clinical Familial Hypercholesterolemia Phenotype from Romania
Source: PubMed Central journal article supplement (PMC8036385; doi:10.3390/jcm10071399), 2021-03-31
Supplement: jcm-10-01399-s001.pdf [file jcm-10-01399-s001.pdf]

**Table S1.** LDLR, APOB and PCSK9 variants identified in the Romanian FH cohort and not reported previously in this population.  
REFERENCE SEQUENCE: NM\_000527.5 for LDLR, NM\_000384.3 for APOB, NM\_174936.3 for PCSK9

| ID  | GENE                                                 | EXON /INTRON                         | DOMAIN                                                                                                                   | cDNA change                                                                              | Protein change                                                                       | dbSNP ID                                                                         | ClinVar assertion                                                                                                | LOVD/HGMD annotation and assertion                                                                          | Sanger confirmation | CV events     |
|-----|------------------------------------------------------|--------------------------------------|--------------------------------------------------------------------------------------------------------------------------|------------------------------------------------------------------------------------------|--------------------------------------------------------------------------------------|----------------------------------------------------------------------------------|------------------------------------------------------------------------------------------------------------------|-------------------------------------------------------------------------------------------------------------|---------------------|---------------|
| H7  | LDLR<br>LDLR                                         | 10<br>11                             | EGF precursor<br>LDLR class B4                                                                                           | c.1413A>G<br>c.1617C>T                                                                   | p.(Arg471=)<br>p.(Pro539=)                                                           | rs5930 He<br>rs5929 He                                                           | Benign<br>Benign                                                                                                 | Benign<br>Benign                                                                                            | YES                 | YES<br>Stroke |
| H8  | LDLR<br>LDLR<br>LDLR                                 | 11<br>12<br>13                       | LDLR class B4<br>LDLR class B5<br>LDLR class B6                                                                          | c.1617C>T<br>c.1773C>T<br>c.1959T>C                                                      | p.(Pro539=)<br>p.(Asn591=)<br>p.(Val653=)                                            | rs5929<br>rs688 Ho<br>rs5925 Ho                                                  | Benign<br>Likely benign<br>Likely benign                                                                         | Benign<br>Benign<br>Benign                                                                                  | YES                 | YES<br>Stroke |
| H10 | LDLR<br>LDLR                                         | 7<br>7i                              | NA<br>Intron                                                                                                             | c.1060+7=<br>c.1060+10G>A                                                                | NA<br>NA                                                                             | rs2738442<br>rs12710260 Ho                                                       | Conflicting interpretations<br>Conflicting interpretations                                                       | No referenced<br>Conflicting interpretations                                                                | YES                 | NO            |
| H14 | LDLR<br>LDLR                                         | 12<br>13                             | LDLR class B5<br>LDLR class B6                                                                                           | c.1773C>T<br>c.1959T>C                                                                   | p.(Asn591=)<br>p.(Val653=)                                                           | rs5929<br>rs5925 He                                                              | Benign<br>Likely benign                                                                                          | Benign<br>Benign                                                                                            | YES                 | NO            |
| H15 | LDLR<br>LDLR                                         | 7<br>7i                              | NA<br>Intron                                                                                                             | c.1060+7=<br>c.1060+10G>A                                                                | NA<br>NA                                                                             | rs2738442<br>rs12710260 Ho                                                       | Conflicting interpretations<br>Conflicting interpretations                                                       | No referenced<br>Conflicting interpretations                                                                | YES                 | NO            |
| H16 | LDLR<br>LDLR                                         | 12<br>13                             | LDLR class B5<br>LDLR class B6                                                                                           | c.1773C>T<br>c.1959T>C                                                                   | p.(Asn591=)<br>p.(Val653=)                                                           | rs5929<br>rs5925 He                                                              | Benign<br>Likely benign                                                                                          | Benign<br>Benign                                                                                            | YES                 | NO            |
| H18 | LDLR<br>LDLR<br>LDLR<br>LDLR<br>LDLR<br>LDLR<br>LDLR | 2<br>7<br>7i<br>10<br>12<br>13<br>15 | ligand-binding<br>NA<br>Intron<br>LDLR class B2<br>LDLR class B5<br>LDLR class B6<br>clustered O-linked oligosaccharides | c.81C>G<br>c.1060+7=<br>c.1060+10G>A<br>c.1413A>G<br>c.1773C>T<br>c.1959T>C<br>c.2232A>G | p.(Cys27Trp)<br>NA<br>NA<br>p.(Arg471=)<br>p.(Asn591=)<br>p.(Val653=)<br>p.(Arg744=) | NA<br>rs2738442<br>rs12710260 Ho<br>rs5930<br>rs688 Ho<br>rs5925 Ho<br>rs5927 Ho | Likely pathogenic<br>Conflicting interpretations<br>Benign<br>Likely benign<br>Benign<br>Likely benign<br>Benign | Probably pathogenic<br>No referenced<br>Conflicting interpretations<br>Benign<br>Benign<br>Benign<br>Benign | YES                 | YES<br>Stroke |
| H19 | LDLR<br>LDLR<br>LDLR<br>LDLR<br>PCSK9                | 7<br>10<br>11<br>12<br>7             | NA<br>LDLR class B2<br>LDLR class B4<br>LDLR class B5<br>NA                                                              | c.1060+7=<br>c.1413A>G<br>c.1618G>A<br>c.1773C>T<br>c.1026A>G                            | NA<br>p.(Arg471=)<br>p.(Ala540Thr)<br>p.(Asn591=)<br>p.(Gln342=)                     | rs2738442<br>rs5930<br>NA<br>rs688 Ho<br>rs509504 Ho                             | Conflicting interpretations<br>Benign<br>Pathogenic<br>Likely benign<br>Conflicting interpretations              | No referenced<br>Benign<br>Likely pathogenic<br>Benign<br>No referenced                                     | YES                 | YES<br>ACS    |
| H24 | LDLR<br>LDLR                                         | 7<br>15                              | NA<br>clustered O-linked oligosaccharides                                                                                | c.1060+7=<br>c.2232A>G                                                                   | NA<br>p.(Arg744=)                                                                    | rs2738442<br>rs5927 Ho                                                           | Conflicting interpretations<br>Benign                                                                            | No referenced<br>Benign                                                                                     | YES                 | YES<br>PAD    |
| H25 | LDLR                                                 | 15                                   | clustered O-linked                                                                                                       | c.2232A>G                                                                                | p.(Arg744=)                                                                          | rs5927 Ho                                                                        | Benign                                                                                                           | Benign                                                                                                      | YES                 | NO            |

|     |               |         |                                     |                                      |                             |                            |                                       |                                |            |            |
|-----|---------------|---------|-------------------------------------|--------------------------------------|-----------------------------|----------------------------|---------------------------------------|--------------------------------|------------|------------|
|     |               |         | oligosaccharides                    |                                      |                             |                            |                                       |                                |            |            |
| H26 | PCSK9<br>APOB | 7<br>26 | NA<br>NA                            | c.1026A>G<br>c.10740C>T              | p.(Gln342=)<br>p.(Asn3580=) | rs509504 Ho<br>rs150312765 | Conflicting interpretations<br>Benign | No referenced<br>No referenced | YES<br>YES | PAD<br>PAD |
| H32 | LDLR          | 7       | NA                                  | c.1060+7=                            | NA                          | rs2738442                  | Conflicting interpretations           | No referenced                  | YES        | YES        |
|     | LDLR          | 10      | LDLR class B2                       | c.1413A>G                            | p.(Arg471=)                 | rs5930                     | Benign                                | Benign                         |            | Stroke     |
|     | LDLR          | 12      | LDLR class B5                       | c.1773C>T                            | p.(Asn591=)                 | rs688 He                   | Likely benign                         | Benign                         |            |            |
|     | LDLR          | 13      | LDLR class B6                       | c.1959T>C                            | p.(Val653=)                 | rs5925 He                  | Likely benign                         | Benign                         |            |            |
|     | LDLR          | 15      | clustered O-linked oligosaccharides | c.2232A>G                            | p.(Arg744=)                 | rs5927 He                  | Benign                                | Benign                         |            |            |
|     | PCSK9         | 7       | NA                                  | c.1026A>G                            | p.(Gln342=)                 | rs509504 Ho                | Conflicting interpretations           | No referenced                  |            |            |
| H40 | LDLR          | 7       | NA                                  | c.1060+7=                            | NA                          | rs2738442                  | Conflicting interpretations           | No referenced                  | YES        | YES        |
|     | LDLR          | 7i      | Intron                              | c.1060+10G>A                         | NA                          | rs12710260 He              | Conflicting interpretations           | Conflicting interpretations    |            | ACS        |
|     | LDLR          | 10      | LDLR class B2                       | c.1413A>G                            | p.(Arg471=)                 | rs5930                     | Benign                                | Benign                         |            |            |
|     | LDLR          | 12      | LDLR class B5                       | c.1773C>T                            | p.(Asn591=)                 | rs688 He                   | Likely benign                         | Benign                         |            |            |
|     | LDLR          | 13      | LDLR class B6                       | c.1959T>C                            | p.(Val653=)                 | rs5925 He                  | Likely benign                         | Benign                         |            |            |
|     | PCSK9         | 7       | NA                                  | c.1026A>G                            | p.(Gln342=)                 | rs509504 Ho                | Conflicting interpretations           | No referenced                  |            |            |
| H41 | LDLR          | 7       | NA                                  | c.1060+7=                            | NA                          | rs2738442                  | Conflicting interpretations           | No referenced                  | YES        | YES        |
|     | LDLR          | 7i      | NA                                  | c.1060+10G>A                         | NA                          | rs12710260                 | Conflicting interpretations           | Conflicting interpretations    |            | Stroke     |
|     | LDLR          | 10      | LDLR class B2                       | c.1413A>G                            | p.(Arg471=)                 | rs5930                     | Benign                                | Benign                         |            |            |
|     | LDLR          | 12      | LDLR class B5                       | c.1773C>T                            | p.(Asn591=)                 | rs688 He                   | Likely benign                         | Benign                         |            |            |
|     | LDLR          | 13      | LDLR class B6                       | c.1959T>C                            | p.(Val653=)                 | rs5925 He                  | Likely benign                         | Benign                         |            |            |
|     | LDLR          | 15      | clustered O-linked oligosaccharides | c.2232A>G                            | p.(Arg744=)                 | rs5927 He                  | Benign                                | Benign                         |            |            |
|     | LDLR          | 12i_15i | A750GfsX29; FH Bologna-2            | c.(1845+1_1846-1)_(2311+1_2312-1)dup | exon 13-15                  |                            | Pathogenic                            | Pathogenic                     |            |            |
| H44 | LDLR          | 2       | LDLR class A1                       | c.81C>T                              | p.(Cys27=)                  | rs2228671                  | Benign                                | Benign                         | YES        | YES        |
|     | LDLR          | 7       | NA                                  | c.1060+7=                            | NA                          | rs2738442                  | Conflicting interpretations           | No referenced                  |            | ACS        |
|     | LDLR          | 10      | LDLR class B2                       | c.1413A>G                            | p.(Arg471=)                 | rs5930                     | Benign                                | Benign                         |            |            |
|     | LDLR          | 11      | LDLR class B4                       | c.1617C>T                            | p.(Pro539=)                 | rs5929 Ho                  | Benign                                | Benign                         |            |            |
|     | LDLR          | 15      | clustered O-linked oligosaccharides | c.2232A>G                            | p.(Arg744=)                 | rs5927 Ho                  | Benign                                | Benign                         |            |            |
|     | LDLR          | 11      | LDLR class B4                       | c.1618G>A                            | p.(Ala540Thr)               | NA                         | Pathogenic                            | Likely pathogenic              |            |            |
| H46 | LDLR          | 7       | NA                                  | c.1060+7=                            | NA                          | rs2738442                  | Conflicting interpretations           | No referenced                  | YES        | YES        |
|     | LDLR          | 7i      | Intron                              | c.1060+10G>A                         | NA                          | rs12710260 He              | Conflicting interpretations           | Conflicting interpretations    |            | ACS        |
|     | LDLR          | 10      | LDLR class B2                       | c.1413A>G                            | p.(Arg471=)                 | rs5930                     | Benign                                | Benign                         |            |            |
|     | LDLR          | 11      | LDLR class B4                       | c.1618G>A                            | p.(Ala540Thr)               | NA                         | Pathogenic                            | Likely pathogenic              |            |            |

|     |                                                               |                                           |                                                                                                                            |                                                                                                      |                                                                                                               |                                                                                               |                                                                                                                                                 |                                                                                                              |                                                      |                                                      |
|-----|---------------------------------------------------------------|-------------------------------------------|----------------------------------------------------------------------------------------------------------------------------|------------------------------------------------------------------------------------------------------|---------------------------------------------------------------------------------------------------------------|-----------------------------------------------------------------------------------------------|-------------------------------------------------------------------------------------------------------------------------------------------------|--------------------------------------------------------------------------------------------------------------|------------------------------------------------------|------------------------------------------------------|
|     | LDLR<br>LDLR<br>LDLR                                          | 12<br>13<br>15                            | LDLR class B5<br>LDLR class B6<br>clustered O-linked oligosaccharides                                                      | c.1773C>T<br>c.1959T>C<br>c.2232A>G                                                                  | p.(Asn591=)<br>p.(Val653=)<br>p.(Arg744=)                                                                     | rs688 He<br>rs5925 He<br>rs5927 He                                                            | Likely benign<br>Likely benign<br>Benign                                                                                                        | Benign<br>Benign<br>Benign                                                                                   |                                                      |                                                      |
| H51 | LDLR<br>LDLR<br>LDLR<br>LDLR<br>LDLR<br>APOB                  | 3<br>7<br>10<br>13<br>15<br>26            | NA<br>NA<br>LDLR class B2<br>LDLR class B6<br>clustered O-linked oligosaccharides<br>NA                                    | c.211G>A<br>c.1060+7=<br>c.1413A>G<br>c.1959T>C<br>c.2232A>G<br>c.10740C>T                           | p.(Gly71Arg)<br>NA<br>p.(Arg471=)<br>p.(Val653=)<br>p.(Arg744=)<br>p.(Asn3580=)                               | rs766903209<br>rs2738442<br>rs5930<br>rs5925 He<br>rs5927 He<br>rs150312765                   | Conflicting interpretations<br>Conflicting interpretations<br>Benign<br>Likely benign<br>Benign<br>Benign                                       | No referenced<br>No referenced<br>Benign<br>Benign<br>Benign<br>No referenced                                | YES<br>YES<br>YES<br>YES<br>YES<br>YES               | YES<br>ACS<br>YES<br>YES<br>YES<br>YES               |
| H52 | LDLR<br>LDLR<br>LDLR<br>LDLR<br>LDLR<br>LDLR<br>PCSK9<br>APOB | 2<br>7<br>10<br>12<br>13<br>15<br>7<br>26 | ligand-binding<br>NA<br>LDLR class B2<br>LDLR class B5<br>LDLR class B6<br>clustered O-linked oligosaccharides<br>NA<br>NA | c.81 C>G<br>c.1060+7=<br>c.1413A>G<br>c.1773C>T<br>c.1959T>C<br>c.2232A>G<br>c.1026A>G<br>c.10740C>T | p.(Cys27Trp)<br>NA<br>p.(Arg471=)<br>p.(Asn591=)<br>p.(Val653=)<br>p.(Arg744=)<br>p.(Gln342=)<br>p.(Asn3580=) | NA<br>rs2738442<br>rs5930<br>rs688 He<br>rs5925 He<br>rs5927 He<br>rs509504 Ho<br>rs150312765 | Likely pathogenic<br>Conflicting interpretations<br>Benign<br>Likely benign<br>Likely benign<br>Benign<br>Conflicting interpretations<br>Benign | Likely pathogenic<br>No referenced<br>Benign<br>Benign<br>Benign<br>Benign<br>No referenced<br>No referenced | YES<br>YES<br>YES<br>YES<br>YES<br>YES<br>YES<br>YES | YES<br>PAD<br>YES<br>YES<br>YES<br>YES<br>YES<br>YES |
| H53 | LDLR<br>LDLR<br>LDLR<br>LDLR<br>PCSK9                         | 7<br>10<br>11<br>15<br>7                  | NA<br>LDLR class B2<br>LDLR class B4<br>clustered O-linked oligosaccharides<br>NA                                          | c.1060+7=<br>c.1413A>G<br>c.1618G>A<br>c.2232A>G<br>c.1026A>G                                        | NA<br>p.(Arg471=)<br>p.(Ala540Thr)<br>p.(Arg744=)<br>p.(Gln342=)                                              | rs2738442<br>rs5930<br>NA<br>rs5927 He<br>rs509504 Ho                                         | Conflicting interpretations<br>Benign<br>Pathogenic<br>Benign<br>Conflicting interpretations                                                    | No referenced<br>Benign<br>Pathogenic<br>Benign<br>No referenced                                             | YES<br>YES<br>YES<br>YES<br>YES                      | YES<br>ACS<br>YES<br>YES<br>YES                      |
| H54 | LDLR<br>LDLR<br>LDLR<br>LDLR                                  | 4<br>7<br>10<br>15                        | LDLR class A4<br>NA<br>LDLR class B2<br>clustered O-linked oligosaccharides                                                | c.502G>A<br>c.1060+7=<br>c.1413A>G<br>c.2232A>G                                                      | p.(Asp168Asn)<br>NA<br>p.(Arg471=)<br>p.(Arg744=)                                                             | rs200727689<br>rs2738442<br>rs5930<br>rs5927 He                                               | Pathogenic<br>Conflicting interpretations<br>Benign<br>Benign                                                                                   | Likely pathogenic<br>No referenced<br>Benign<br>Benign                                                       | YES<br>YES<br>YES<br>YES                             | YES<br>Stroke<br>YES<br>YES                          |
| H55 | LDLR<br>LDLR<br>LDLR<br>LDLR<br>LDLR                          | 2<br>7<br>7i<br>10<br>15                  | LDLR class A1<br>NA<br>Intron<br>LDLR class B2<br>clustered O-linked                                                       | c.81C>T<br>c.1060+7=<br>c.1060+10G>A<br>c.1413A>G<br>c.2232A>G                                       | p.(Cys27=)<br>NA<br>NA<br>p.(Arg471=)<br>p.(Arg744=)                                                          | rs2228671<br>rs2738442<br>rs12710260 He<br>rs5930<br>rs5927 Ho                                | Benign<br>Conflicting interpretations<br>Conflicting interpretations<br>Benign<br>Benign                                                        | Benign<br>No referenced<br>Conflicting interpretations<br>Benign<br>Benign                                   | YES<br>YES<br>YES<br>YES<br>YES                      | NO<br>NO<br>NO<br>NO<br>NO                           |

|     |      |    |                                     |              |             |            |                             |                             |     |     |
|-----|------|----|-------------------------------------|--------------|-------------|------------|-----------------------------|-----------------------------|-----|-----|
|     |      |    | oligosaccharides                    |              |             |            |                             |                             |     |     |
| H56 | LDLR | 7  | NA                                  | c.1060+7=    | NA          | rs2738442  | Conflicting interpretations | No referenced               | YES | NO  |
|     | LDLR | 10 | LDLR class B2                       | c.1413A>G    | p.(Arg471=) | rs5930     | Benign                      | Benign                      |     |     |
|     | LDLR | 12 | LDLR class B5                       | c.1773C>T    | p.(Asn591=) | rs688 He   | Likely benign               | Benign                      |     |     |
|     | LDLR | 13 | LDLR class B6                       | c.1959T>C    | p.(Val653=) | rs5925 He  | Likely benign               | Benign                      |     |     |
|     | LDLR | 15 | clustered O-linked oligosaccharides | c.2232A>G    | p.(Arg744=) | rs5927 Ho  | Benign                      | Benign                      |     |     |
| H57 | LDLR | 2  | LDLR class A1                       | c.81C>T      | p.(Cys27=)  | rs2228671  | Benign                      | Benign                      | YES | YES |
|     | LDLR | 7  | NA                                  | c.1060+7=    | NA          | rs2738442  | Conflicting interpretations | No referenced               |     | PAD |
|     | LDLR | 7i | Intron                              | c.1060+10G>A | NA          | rs12710260 | Conflicting interpretations | Conflicting interpretations |     |     |
|     | LDLR | 10 | LDLR class B2                       | c.1413A>G    | p.(Arg471=) | rs5930     | Benign                      | Benign                      |     |     |
|     | LDLR | 12 | LDLR class B5                       | c.1773C>T    | p.(Asn591=) | rs688 He   | Likely benign               | Benign                      |     |     |
|     | LDLR | 13 | LDLR class B6                       | c.1959T>C    | p.(Val653=) | rs5925 He  | Likely benign               | Benign                      |     |     |
|     | LDLR | 15 | clustered O-linked oligosaccharides | c.2232A>G    | p.(Arg744=) | rs5927 Ho  | Benign                      | Benign                      |     |     |

\*Words written in red signify pathogenic mutations
